# Supplementary material for: The hitchhiker's guide to Europe: the infection dynamics of an ongoing Wolbachia invasion and mitochondrial selective sweep in Rhagoletis cerasi
Source: PubMed Central journal article supplement (PMC4950298; doi:10.1111/mec.13571), 2016-03-15

A

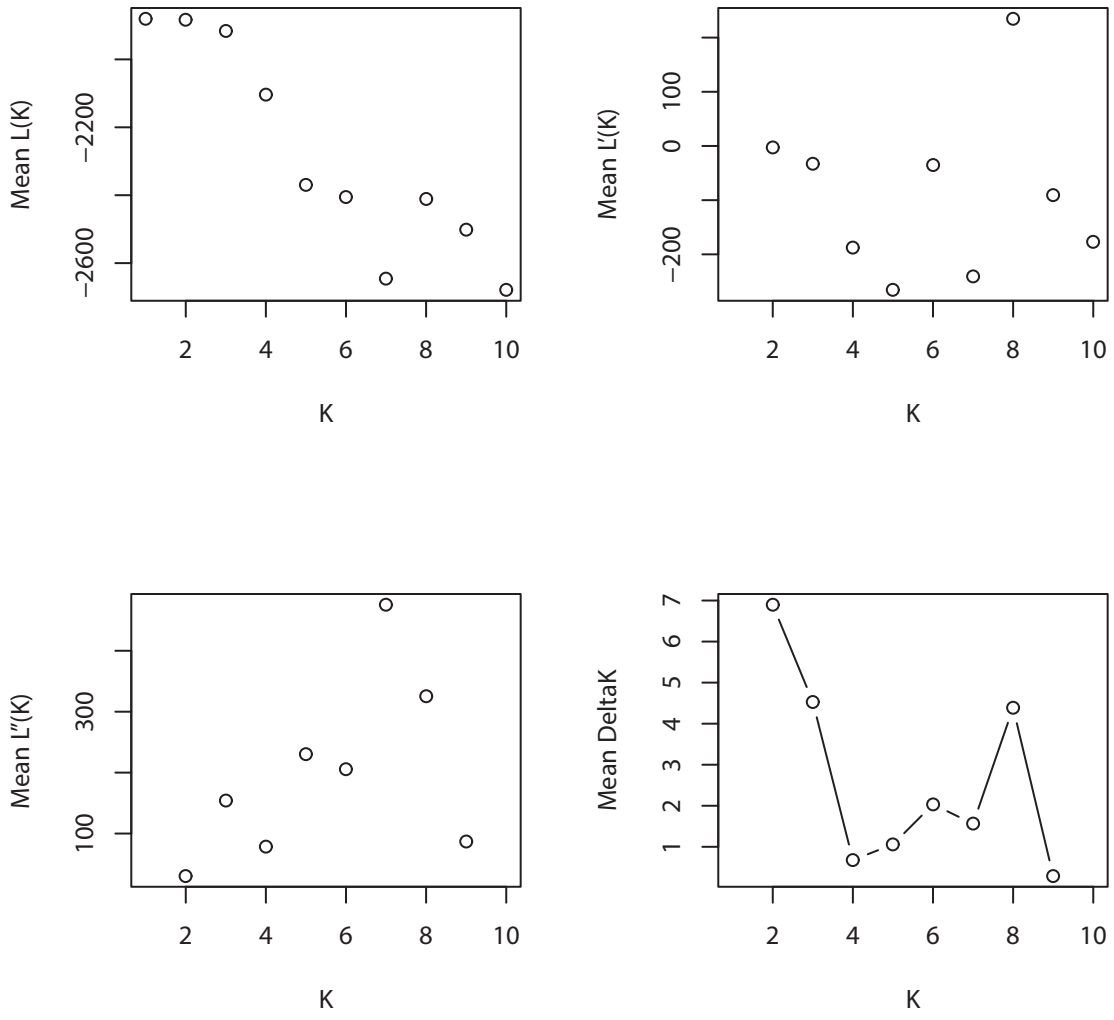

B

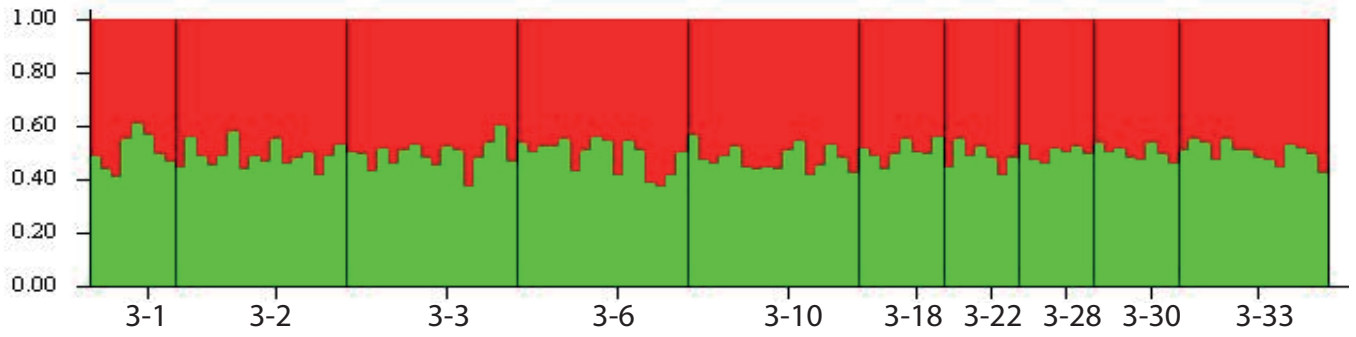

C

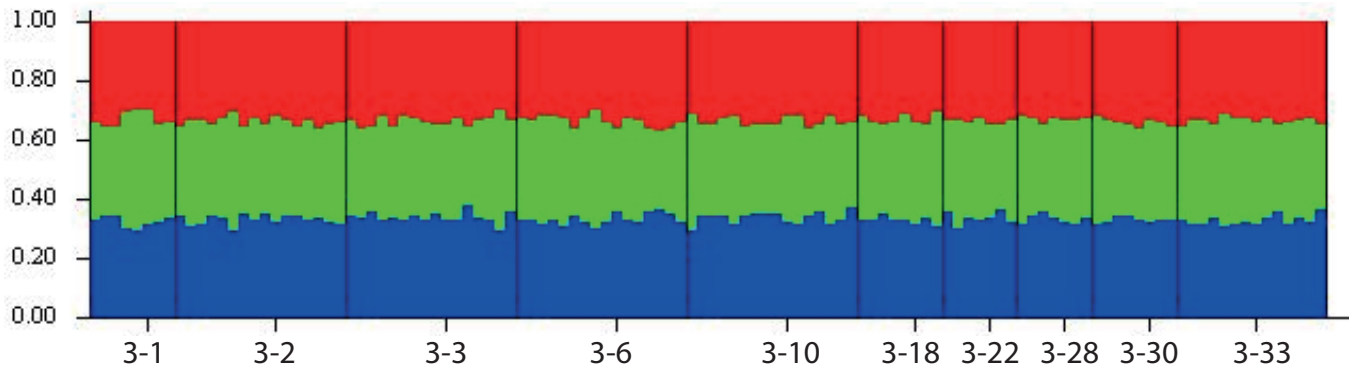

Supplement: MEC-25-1595-s001.pdf [file MEC-25-1595-s001.pdf]
